# Supplementary material
Source: PubMed Central journal article supplement (PMC1383568)
Supplement: 7600988s1.pdf [file 7600988s1.pdf]

**A**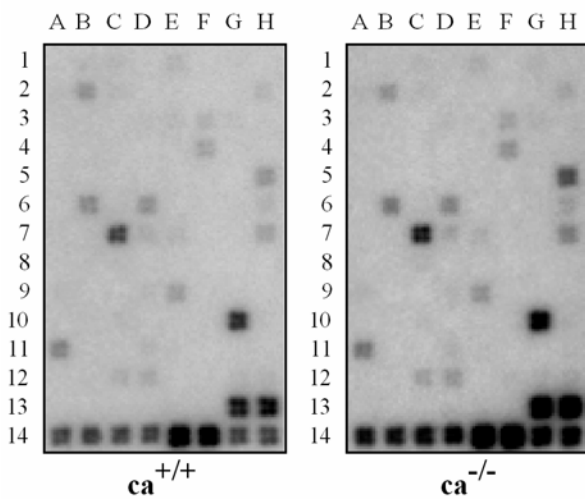**B****Neurotrophins and Receptors:**

|                          |           |
|--------------------------|-----------|
| Adcyap1r1                | A1        |
| <b>Artn</b>              | <b>C1</b> |
| <b>Bdnf</b>              | <b>G1</b> |
| Cbln1                    | H1        |
| <b>CNTF</b>              | <b>B2</b> |
| <b>CNTFR</b>             | <b>C2</b> |
| Crh                      | D2        |
| CRH-BP                   | E2        |
| Crhr                     | F2        |
| Crhr2                    | G2        |
| Prothrombin<br>kringle-1 | C3        |

|               |           |
|---------------|-----------|
| FUS           | H3        |
| Gdnf          | A4        |
| GFRa1         | B4        |
| GFRa2         | C4        |
| GFRa3         | D4        |
| GFRa4         | E4        |
| <b>Gmfb</b>   | <b>F4</b> |
| Gmfg          | G4        |
| Orexin-R1     | B5        |
| Mox2R         | C5        |
| <b>Maged1</b> | <b>H6</b> |
| Maged3        | A7        |

|                |           |
|----------------|-----------|
| <b>MT3</b>     | <b>C7</b> |
| NGFb           | F7        |
| Ngfr           | G7        |
| <b>Ngfrap1</b> | <b>H7</b> |
| PXR            | H8        |
| <b>Nrg1</b>    | <b>A9</b> |
| Nrg4           | B9        |
| Ntf3           | C9        |
| <b>Ntrk1</b>   | <b>D9</b> |
| <b>Ntrk2</b>   | <b>E9</b> |
| Ntrk3          | F9        |
| enkephalin     | G9        |

|               |            |
|---------------|------------|
| Pnoc          | H9         |
| Pspn          | A10        |
| PE22          | B10        |
| Frs2          | E10        |
| Frs3          | F10        |
| Tachykinin 1  | F11        |
| Cd40          | B12        |
| Urocortin     | E12        |
| <b>Vgf</b>    | <b>F12</b> |
| <b>Zfp110</b> | <b>G12</b> |
| <b>Zfp369</b> | <b>H12</b> |

**Neuropeptides and Receptors:**

|           |    |
|-----------|----|
| NY2R/NPFF | H4 |
| Orexin    | A5 |
| NMBR      | A8 |

|            |           |
|------------|-----------|
| Npff       | B8        |
| <b>Npy</b> | <b>C8</b> |
| Npy1r      | D8        |

|       |    |
|-------|----|
| Npy2r | E8 |
| Npy5r | F8 |
| NY6R  | G8 |

**Growth Factors and Receptors:**

|             |           |
|-------------|-----------|
| <b>FGF2</b> | <b>D3</b> |
| <b>FGF9</b> | <b>E3</b> |

|              |            |
|--------------|------------|
| <b>Fgfr1</b> | <b>F3</b>  |
| <b>Ptn</b>   | <b>C10</b> |

|       |     |
|-------|-----|
| Tgfa  | G11 |
| Tgfb1 | H11 |

|         |     |
|---------|-----|
| Tgfb1i1 | A12 |
|---------|-----|

**Chemokine Receptors:**

|              |           |
|--------------|-----------|
| <b>Cxcr4</b> | <b>A2</b> |
|--------------|-----------|

|               |           |
|---------------|-----------|
| <b>Cx3cr1</b> | <b>H2</b> |
|---------------|-----------|

**Cytokines and Receptors:**

|              |           |
|--------------|-----------|
| <b>IL-1b</b> | <b>H5</b> |
| IL1-R1       | A6        |
| <b>IL-6</b>  | <b>B6</b> |

|              |           |
|--------------|-----------|
| IL-6R        | C6        |
| <b>Gp130</b> | <b>D6</b> |
| IL-10        | E5        |

|         |    |
|---------|----|
| IL-10Ra | F5 |
| IL-10Rb | G5 |
| Lif     | F6 |

|       |    |
|-------|----|
| Lif-R | G6 |
|-------|----|

**Signaling Molecules:**

|            |           |              |           |              |            |               |            |
|------------|-----------|--------------|-----------|--------------|------------|---------------|------------|
| Atf2       | D1        | Jun          | E6        | Rsk-4        | D10        | Stat4         | B11        |
| Elk1       | A3        | Mef2c        | B7        | <b>Stat1</b> | <b>G10</b> | Stat5a        | C11        |
| Ets1       | B3        | <b>Myc</b>   | <b>D7</b> | Stat2        | H10        | <b>Stat5b</b> | <b>D11</b> |
| <b>Fos</b> | <b>G3</b> | <b>Ncoal</b> | <b>E7</b> | <b>Stat3</b> | <b>A11</b> | Stat6         | E11        |

**Apoptosis Related Genes:**

|              |           |       |    |              |            |
|--------------|-----------|-------|----|--------------|------------|
| <b>Apaf1</b> | <b>B1</b> | Bcl-2 | F1 | <b>Fas</b>   | <b>C12</b> |
| <b>Bax</b>   | <b>E1</b> | Hsp25 | D5 | <b>Trp53</b> | <b>D12</b> |

**Controls:**

|             |       |       |       |         |       |
|-------------|-------|-------|-------|---------|-------|
| PUC18 (neg) | A-C13 | GAPDH | G-H13 | Rpl13a  | E-F14 |
| Blank (neg) | D-F13 | Ppia  | A-D14 | b-actin | G-H14 |

**Suppl. Fig. 1, Wagner et. al**

**Supplementary Figure 1:**

(A) Hybridization of wild-type and EGFR<sup>-/-</sup> cortical astrocyte cDNA on mouse neurotrophin and receptors gene arrays (GEArray Q Series, MM-018). (B) Functional grouping and indication of the respective position of all the genes present on the GEArray membranes shown in A. Names in bold represent genes expressed in EGFR<sup>+/+</sup> and/or EGFR<sup>-/-</sup> cortical astrocytes.
