# Supplementary material
Source: PubMed Central journal article supplement (PMC1383568)
Supplement: 7600988s2.pdf [file 7600988s2.pdf]

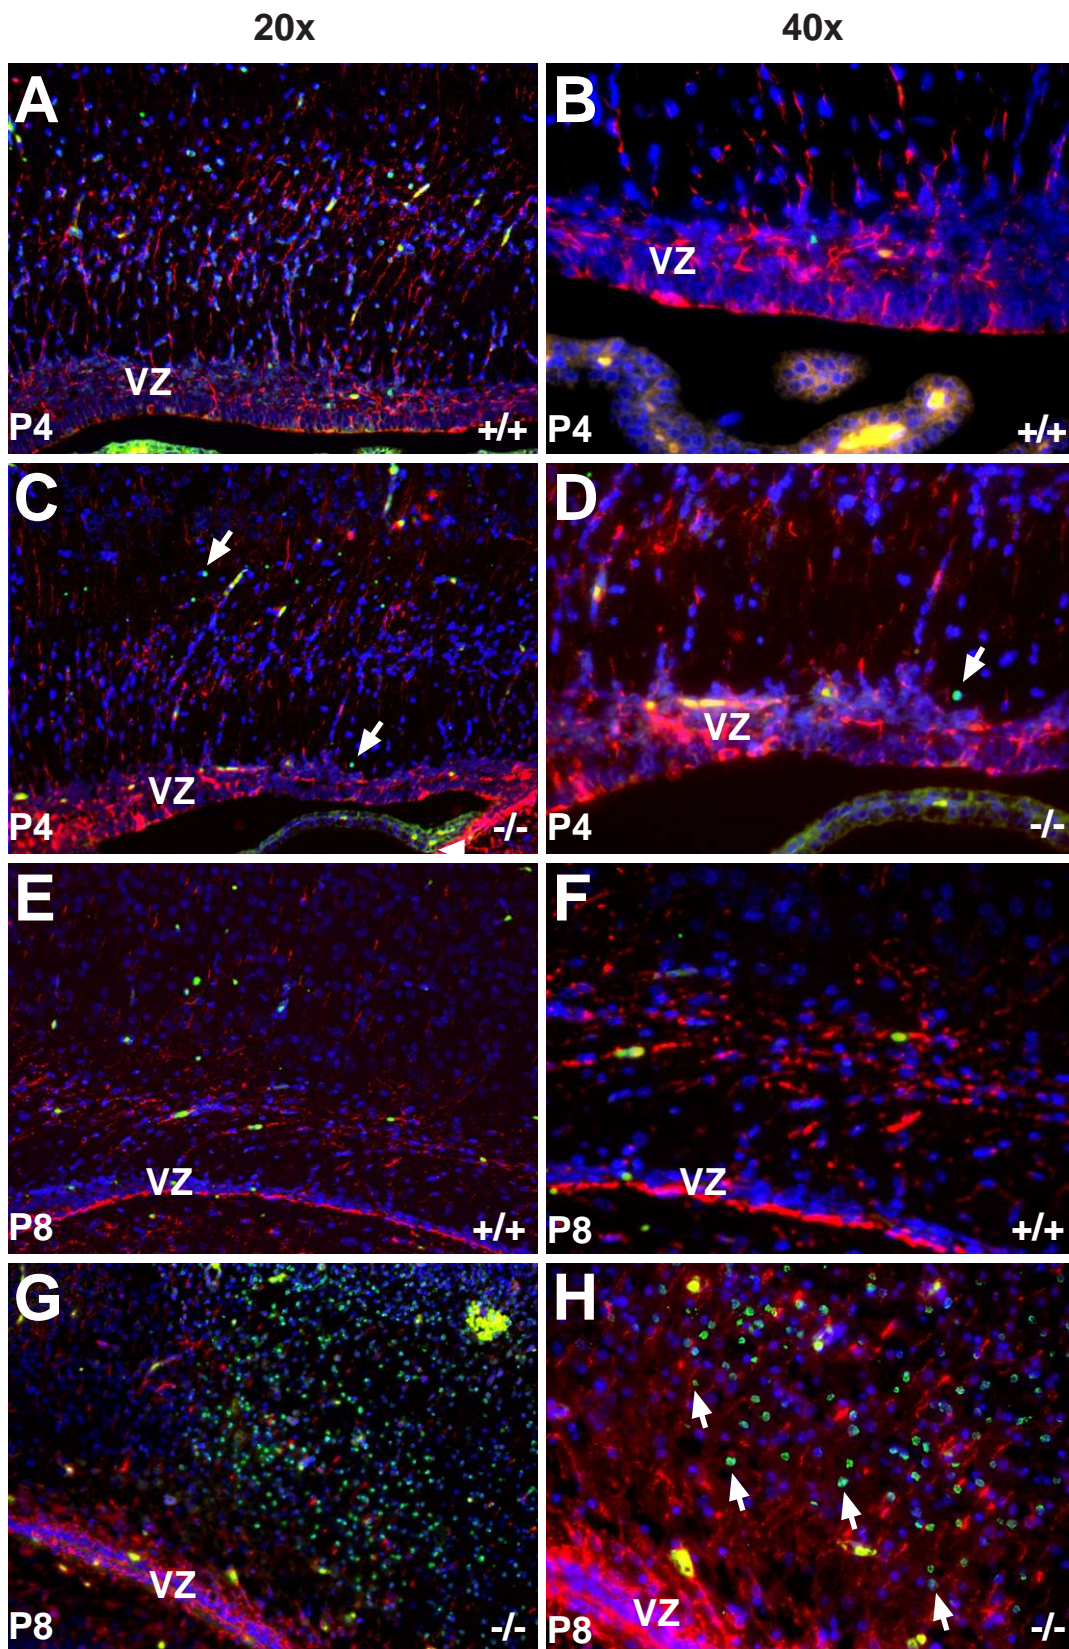

Suppl. Fig 2, Wagner et al.

**Suppl. Fig. 2. Analysis of astrocyte apoptosis in vivo**

GFAP and TUNEL co-staining of cortical sections from P4 (**A-D**) and P8 (**E-H**) wild-type (**A, B, E, F**) and EGFR<sup>-/-</sup> (**C, D, G, H**) brains. Photographs were taken from cortical regions located above the ventricular zone (VZ) and pictures on the right are higher magnifications (40x) from those shown on the left (20x). Arrows in C, D, H point to apoptotic nuclei. Immunofluorescence stainings were performed using GFAP (red) as an astrocytic marker, DAPI (blue) as a nuclear counterstain and TUNEL (green) for apoptotic cells.
